1            **Forgot what you like? Evidence for hippocampal dependence of**  
2                                                **value-based decisions**

3            Abbreviated title: Hippocampal dependence of value-based decisions

4            A. Z. Enkavi\*<sup>1,2</sup>, B. Weber\*<sup>3,4</sup>, I. Zewyer<sup>3,4</sup>, J. Wagner<sup>3</sup>, C.E. Elger<sup>3,4</sup>, E. U. Weber<sup>1</sup>, E. J.  
5 Johnson<sup>1</sup>

6            \* Equally contributing first authors, listed in alphabetical order

7            <sup>1</sup> Center for Decision Science, Columbia University, Uris Hall, 3022 Broadway, New  
8 York, NY 10027-6902

9            <sup>2</sup> Corresponding Author

10            <sup>3</sup> Department of Epileptology, Sigmund-Freud-Str.25, University Hospital Bonn, 53127  
11 Bonn, Germany

12            <sup>4</sup> Center for Economics and Neuroscience, Nachtigallenweg 86, University of Bonn.  
13 53127 Bonn, Germany

14            Acknowledgements: BW was funded by a Heisenberg-Grant of the German Research  
15 Council (WE 4427/3-2) and EUW and EJJ by NIA Grant 5R01AG027934. AZE is currently  
16 at the Department of Psychology of Stanford University and EUW is at Woodrow Wilson  
17 School, Andlinger Center for Energy & Environment, and Department of  
18 Psychology, Princeton University. The authors declare no competing financial interests.  
19

20

## Abstract

21 Consistent decisions are intuitively desirable and theoretically important for utility  
22 maximization. Neuroeconomics has established the neurobiological substrate of value  
23 representation, but brain regions that provide input to the value-processing network is less  
24 explored. The constructed-preference tradition within behavioral decision research gives a  
25 critical role to cognitive processes that rely on associations, suggesting a role for the  
26 hippocampus in making decisions and to do so consistently. We compared the performance of  
27 31 patients with mediotemporal lobe (MTL) epilepsy and hippocampal lesions, 30 patients  
28 with extratemporal lobe epilepsy, and 30 healthy controls on two tasks: binary choices  
29 between candy bars based on their preferences and a number-comparison control task where  
30 the larger number is chosen. MTL patients make more inconsistent choices than the other two  
31 groups for the value-based choice but not the number-comparison task. These inconsistencies  
32 increase with the volume of compromised hippocampal tissue. These results suggest a critical  
33 involvement of the MTL in preference construction and value-based choices.

34

## Significance

35 Our days are full of choices that reflect our preferences. Economics lays out models of  
36 how to optimally make these decisions. Neuroeconomics has identified a cortical value-  
37 processing network whose activity correlates with constructs related to valuation and choice  
38 in economic models. However open questions remain: How are these value signals formed,  
39 and what regions might be necessary for retrieving and computing these value signals?  
40 Inspired by cognitive models calling on associative processes in value-based decisions, this  
41 paper uses unique neuropsychological data to establish the critical role of the medial temporal  
42 lobe in making consistent choices and further informs our understanding of the value-  
43 processing network.

## 44 Keywords

45 Value representation, neuroeconomics, hippocampus, neuropsychology

## 46 **Introduction**

47       Decision neuroscience made significant progress in identifying neurobiological correlates  
48 of value representations using paradigms involving simple choices between two stimuli based  
49 on underlying preferences (Hare, Camerer, & Rangel, 2009; Plassmann, O’Doherty, &  
50 Rangel, 2007). A value network involving a fronto-striatal circuit including the ventral  
51 striatum (VS) and the ventromedial prefrontal cortex (vmPFC), and posterior cingulate cortex  
52 (PCC) has been proposed (Bartra, McGuire, & Kable, 2013; Haber & Knutson, 2010). An  
53 unsolved question is where the value signals processed by this network come from,  
54 particularly for complex stimuli.

55       One influential conceptualization of preference construction proposes multiple steps  
56 including retrieval of relevant experiences with stimuli in the choice set, comparison of  
57 relevant attributes to reach a decision value, imagining future consequences of potential  
58 choices, that can be categorized as memory-related processes (retrospective or prospective)  
59 (Rangel, Camerer, & Montague, 2008; Weber and Johnson, 2009)

60       A long line of work in cognitive neuroscience shows the importance of the medial  
61 temporal lobe (MTL) in these processes (Squire, Stark, & Clark, 2004). The involvement and  
62 interaction of the MTL with the value network only recently attracted attention (Shadlen and  
63 Shohamy, 2016). Wimmer and Shohamy (2012) show MTL involvement in the value transfer  
64 of rewarded stimuli by associative learning that biases later decisions on non-rewarded  
65 stimuli. Barron, Dolan, and Behrens (2013) show activity in the hippocampus, in addition to  
66 medial prefrontal cortex, when subjects were asked to indicate preferences for novel food  
67 items based on familiar, but previously uncombined tastes. Gluth et al. (2015) show that  
68 choices are limited by memory constraints, which is associated with functional connectivity  
69 between the hippocampus and vmPFC (Gluth, Sommer, Rieskamp, & Büchel, 2015). Work  
70 motivated by the hippocampus’ involvement in imagining future experiences (Hassabis,  
71 Kumaran, Vann, & Maguire, 2007; Schacter, Addis, & Buckner, 2007) find that participants

72 asked to imagine future events make more patient value-related decisions across time, which  
73 correlates with stronger activity in a set of brain regions including the hippocampus (Peters &  
74 Büchel, 2010). Impairment of these structures relates to more impatient choices, as shown in  
75 patients with subjective cognitive impairments regarded as a pre-stage of neurodegenerative  
76 disorders (Hu et al., 2017).

77 These studies suggest the involvement of the hippocampus and memory processes in  
78 value-related decision-making, but do not provide conclusive evidence that these processes  
79 are needed for such decisions. Such evidence requires comparing value-related decision-  
80 making abilities in the absence or impairment of these brain regions. Finding such differences  
81 would substantiate psychological models of decision-making involving memory processes and  
82 extend our understanding of the neural value network and the origins of value signals for  
83 complex options. Work that established the role of the ventromedial frontal region as crucial  
84 in the value network used this method: Patients with damage in these areas performed poorly  
85 in value-related decisions compared both to healthy controls, as well as patients with lesions  
86 elsewhere in the frontal cortex (Camille, Griffiths, Vo, Fellows, & Kable, 2011; Fellows &  
87 Farah, 2007).

88 Given these findings, we ask whether patients with hippocampal sclerosis are impaired in  
89 making consistent value-based decisions. Hippocampal sclerosis is a key neuropathological  
90 feature in patients with mesial temporal lobe epilepsy (Berkovic et al. 1991), with  
91 neurosurgical removal of the medial temporal lobe showing a high seizure-free rate. These  
92 patients show neuropsychological deficits mainly in the memory domain (Lin, Mula &  
93 Hermann, 2012; Hoppe, Elger, & Helmstaedter, 2007). To control for other epilepsy-related  
94 factors, like anticonvulsive medication or social effects of having seizure, we included in  
95 addition to healthy controls, a control group of patients with lesions outside of the temporal  
96 lobe. We test the affection of value-based decisions with binary choices among familiar food  
97 products. Our measure of choice quality is transitivity, the degree to which preferences are

98 internally consistent. If a person chooses (Fig. 1.) Rolo over Bounty, and Bounty over Mars,  
99 choice transitivity requires they pick Rolo over Mars (Samuelson, 1938). Decision  
100 neuroscience uses this metric to quantify choice quality (Camille et al., 2011; Fellows &  
101 Farah, 2007; Fellows, 2006a; Kalenscher, Tobler, Huijbers, Daselaar, & Pennartz, 2010). As  
102 in this previous research, we included a pairwise judgment (rather than preference) task as a  
103 control, presenting respondents with pairs of numbers and asking them to judge which of the  
104 two is larger. This protocol is similar to that used to establish the necessary role of the vmPFC  
105 in value-related decisions (Fellows & Farah, 2007). Thus, selective differences in patients  
106 with MTL damage in value-based choices compared to numerical decisions should provide  
107 strong evidence for the involvement of the hippocampus, and thereby mnemonic processes, in  
108 value-based decision-making.

## 109 **Methods**

110 The study was approved by the local ethics committee of the University of Bonn and the  
111 Institutional Review Board at Columbia University (IRB-AAAB1301) and all subjects gave  
112 their written informed consent.

113 A total of 91 respondents participated. Thirty-one patients (15 female; mean age 47.74  
114 with SD 2.56) suffering from mesial temporal lobe epilepsy with clinically diagnosed uni-  
115 lateral (left:n=14;right:n=8) or bilateral (n=9) hippocampal sclerosis from the presurgical  
116 program at the Department of Epileptology in Bonn were included in the study (here on  
117 referred to as MTL group). Different from patients with lesions in the vmPFC (Fellows &  
118 Farrah, 2007), the lesion locations in MTL patients are very similar. This makes lesion  
119 volume a better individual difference marker, as described below. Two control groups  
120 consisted of thirty patients with extratemporal lobe epilepsy (14 female; mean age 43.10 with  
121 SD 2.60; ETL group) and thirty healthy control subjects (15 female; mean age 51.40 with SD  
122 2.60; CON group), respectively.

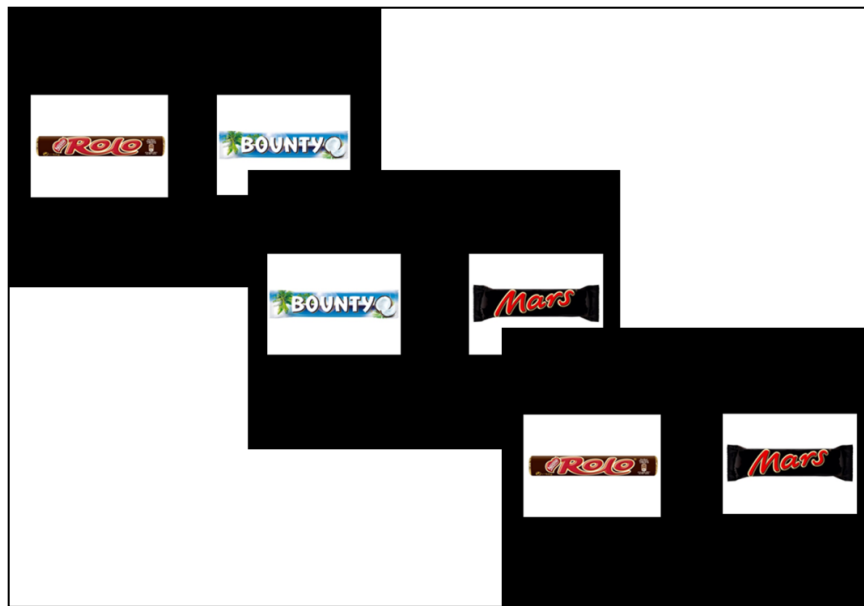

123

124 **Fig. 1.** Three trials of the binary choice experiment. Subject indicated their preferred candy  
125 bar on each trial. Stimulus presentation and choice was self-paced, with a maximum length of  
126 5 seconds.

127

128 Each respondent made a series of choices between pairs of 20 candy bars, presented  
129 pictorially on a computer as in Figure 1. Each pairwise combination was presented once,  
130 resulting in  $(20 \times 19) / 2 = 190$  choices for each participant, with a different random order. In a  
131 control task, subjects were presented with pairs of numbers, drawn from the range of one to  
132 twenty, and had to judge which number was larger. We computed judgment inconsistency  
133 across triplets of comparison identically for the two tasks. Subjects knew that they would  
134 receive their candy bar of choice from one randomly selected choice trial, in addition to a  
135 participation fee of 10 €.

136 Our focal dependent measure was the proportion of intransitive choices. A triplet is  
137 intransitive if (i) A was chosen over B and B was chosen over C, yet C was chosen over A or  
138 (ii) if B was chosen over A and C was chosen over B, yet A was chosen over C. (Fig 1. E.g. A  
139 can be Rolo, B, Bounty and C, Mars as described in the Introduction).

140 The proportion of intransitive choices was obtained by dividing the number of intransitive  
141 triplets by the total number of triplets. Analytically, it can be shown that the maximum level  
142 of intransitivities (those produced by a random responder) is 25% of all triplets. Below we

143 report the results of simulations that demonstrate the non-linear relationship between number  
144 of intransitive choices and response error.

145 We also obtained, for a random subgroup of the patients with unilateral hippocampal  
146 sclerosis (n=16), a 3D-T1 weighted high-resolution data set (MP-RAGE, voxel size  
147 1x1x1mm, repetition time 1570ms, echo time 3.42ms, flip angle 15°, field of view 256mm x  
148 256mm) for volumetric measurement of the hippocampus. This was done in a fully automated  
149 manner by means of the FreeSurfer image analysis suite (Version 5.1.0, Martinos Center,  
150 Harvard University, Boston, MA, USA.; FreeSurfer, RRID:SCR\_001847) (Fischl et al.,  
151 2002, 2004). Because of the high variance in total hippocampal volume between individuals,  
152 we used a lateral damage index of hippocampal volume to express the extent of unilateral  
153 hippocampal damage in our MTL group:

$$LDI = abs\left(\frac{V_{Hippol} - V_{HippoR}}{V_{Hippol} + V_{HippoR}}\right)$$

154

155 This lateral damage index can obviously be only assessed for subjects with unilateral  
156 hippocampal sclerosis.

### 157 **Experimental Design and Statistical Analysis**

158 Our sample size was constrained by the availability of MTL patients with the  
159 appropriate lesion. Still, a power analysis based on effect sizes for healthy participants in the  
160 literature suggested we were well powered. Assuming a base proportion of 3% of  
161 intransitivities for healthy controls (Lee, Amir, & Ariely, 2009) and the same for ETL patients  
162 in contrast to twice this amount for the MTL patients, a large (and therefore conservative)  
163 estimate (i.e. an effect size of  $f = 0.4$ ), we would need a total of 60 participants for a power  
164 level of 0.95. Our sample with at least 30 subjects per group was well above this.

165 To perform statistical analysis on our focal behavioral dependent measure, the  
166 intransitivity proportions were log transformed to avoid non-normal distributions and unequal  
167 variances between the tasks. Based on model comparisons, a linear mixed model was deemed

168 the appropriate analysis having compared it to simpler models with no random effects. The  
169 contrasts of this model were orthogonalized to allow a direct comparison of the ETL group to  
170 the healthy controls and of the MTL group to both control groups together.

171 Statistical analyses were performed using R (Version 3.3.2; R Project for Statistical  
172 Computing, RRID:SCR\_001905) for Mac. We use a two-tailed p-value of 0.05 as our  
173 criterion for statistical significance. The details of multilevel models are reported in the  
174 Results section.

## 175 Results

176 As shown in Figure 2, MTL patients showed a greater percentage of intransitive  
177 choices compared to the two control groups in the preference task, but not in the control task  
178 (mean percentages for the preference task: MTL: 6.07%; ETL: 3.37%; CON: 2.75%; median  
179 percentages: MTL: 4.56%; ETL 2.72%; CON: 2.94%; mean percentages for the control task:  
180 MTL: 0.50 %; ETL: 1.00%; CON: 0.14%, median percentages: MTL: 0.36%; ETL: 0.00%;  
181 CON: 0.04%. This analysis used a linear mixed model regressing log transformed  
182 intransitivity percentages on an interactive model of group and task factors with orthogonal  
183 contrasts. The MTL-group task interaction was  $b = -0.06$ ,  $t(91) = -2.98$ ,  $p = 0.004$ ). The  
184 difference between degree of intransitivity between the preference and control task did not  
185 differ significantly between the two control groups (linear mixed model with orthogonal  
186 contrasts ETL-group task interaction  $b = -0.04$ ,  $t(91) = 0.97$ ,  $p = 0.333$ ).

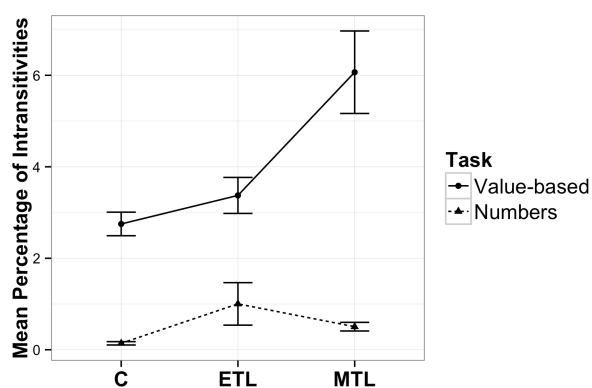

187



188 **Fig. 2.** Mean percentage of intransitive choices per group in each task ( $n_{\text{MTL}} = 31$ ,  $n_{\text{C}} = 30$ ,  
 189  $n_{\text{ETL}} = 30$ ). Error bars represent SEM.  
 190

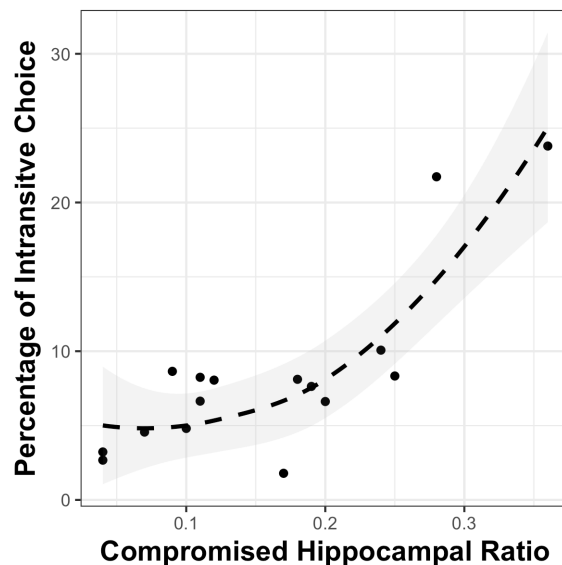

191  
 192 **Fig. 3.** Relationship between hippocampal lesion volume and intransitive choices.  
 193 Scatterplot of compromised hippocampal volume (as a ratio of total volume) against  
 194 percentage of intransitive choices. Smoothing is done with locally with  $\alpha = 2$ . The observed  
 195 robust nonparametric rank order correlation  $\rho=0.676$ ,  $p=0.004$ .  
 196

197 For a subset of patients with available MRIs we determined the ratio of compromised  
 198 hippocampal volume to total volume and correlated this individual difference variable with  
 199 the percentage of intransitive choices observed for these participants. We used a non-  
 200 parametric correlation coefficient that is insensitive to outliers because it is calculated using  
 201 rank order. We found a strong and significant relationship between these two variables, as  
 202 shown in Figure 3 (Spearman- $\rho = 0.676$ ;  $F(1, 14) = 11.78$ ,  $p=0.004$ ;  $n=16$ ), such that the  
 203 larger the lesion volume, the less consistent were the value-based choices.

204 To provide context for interpreting the observed frequencies of intransitivity, we  
 205 conducted a series of simulations that use a random utility model with a stochastic term added  
 206 to the utility of the options, such that the probability of choosing option A ( $p(A)$ ) in a  
 207 decision between A and B is:

$$p(A) = \frac{1}{1 + e^{((1-\alpha)u(B) + \alpha\varepsilon) - ((1-\alpha)u(A) + \alpha\varepsilon)}}$$

208 Equation 1

209 where  $u(A)$  and  $u(B)$  represent the utilities of options  $A$  and  $B$ ,  $\alpha$  represents the proportion  
210 (between 0 and 1) of the observed utility due to random error, and  $\epsilon$  is the random error. It can  
211 be shown analytically that the maximum proportion of intransitive triples is .25 (Figure 4, also  
212 see the discussion section of Tversky, 1969). Our question of interest is the effect of  $\alpha$ , the  
213 proportion of random error upon intransitivity. Our hypothesis is that the degree of MTL  
214 patients' hippocampal sclerosis increases  $\alpha$ , since access to past experiences that would  
215 normally be called on to make a choice is impaired. We simulated how the proportion of  
216 intransitive triples increases as noise in utilities increases. The effect is non-linear (Figure 5),  
217 and the observed intransitivities in the MTL group correspond to an  $\alpha$  of .3, i.e., the level  
218 expected if random error represented approximately 30 percent of the utility values in  
219 Equation 1.

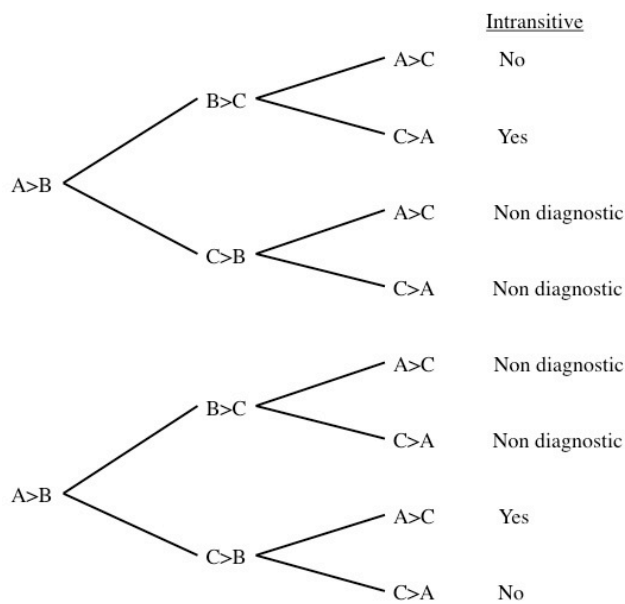

220

221 **Figure 4:** Tree diagram indicating possible intransitive paths from three binary choices.

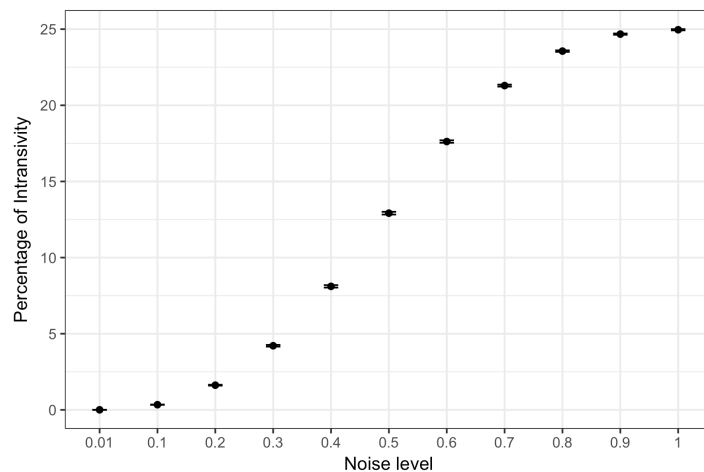

222

223 **Figure 5:** Mean percentage of intransitivities at different noise levels ( $\alpha$ ), based on 1000  
224 simulations at each noise level. Error bars indicate standard errors.

225 We can test several alternative explanations to our account of random error in value  
226 construction for our data. One alternative explanation is that respondents retain explicit  
227 episodic memory of previous value comparisons during the task, and do not perform value  
228 construction for the two options of each pairwise choice. Under this account, non-MTL  
229 respondents may have better memory for their choices made earlier in the task, and this better  
230 episodic memory prevents intransitive choices. This account would suggest that the rate of  
231 intransitivities declines over time, as previous choices are remembered and used to avoid  
232 intransitive later choices. We might expect this decline in intransitivities over choice trials  
233 would differ for the MTL and non-MTL groups. We tested this hypothesis by regressing  
234 whether or not a triplet was intransitive on the trial number of the last seen trial in that triplet.  
235 We found no increase in the probability of a triplet being intransitive depending on when the  
236 subjects saw the last trial in that triplet ( $b = 0.027$ ,  $z = 0.79$ ,  $p = 0.427$ ) nor was this trend  
237 different for the MTL group ( $b = 0.032$ ,  $z = -0.78$ ,  $p = 0.434$ ).

238 An account emphasizing episodic memories of previous choices during the task makes a  
239 more specific hypothesis: It would predict that the probability of intransitivity depends on the  
240 delay (number of trials) between the choices involving the items that define  
241 an intransitive triplet. To test this we checked whether a triplet was more likely to be

242 intransitive depending on the variance in the trial numbers involved in that triplet. We found  
243 that the further apart from each other the three choices in a triplet were made the more likely  
244 they were to be intransitive ( $b = 0.109$ ,  $z = 3.40$ ,  $p = 0.007$ ). Crucially, however, this pattern  
245 was not different for the MTL group ( $b = -0.049$ ,  $z = 1.25$ ,  $p = 0.213$ ). That is, the group  
246 differences in intransitivity cannot be explained by impairments of episodic memories *during*  
247 the task.

248 Another alternative explanation involves group differences in speed-accuracy tradeoff. To  
249 test this, we examined response latencies of the choices, and the relationship between  
250 responses latencies and intransitivities for MTL and non-MTL groups. Contrary to a speed-  
251 accuracy tradeoff, we found that slower (rather than faster) trials were more likely to be  
252 involved in intransitive triplets ( $b = 0.441$ ,  $t(16985) = 4.40$ ,  $p = 0.00001$ ) for all groups, and  
253 that this did not differ for the MTL group (i.e., no interaction with this group:  $b = -0.0846$ ,  
254  $t(16985) = -0.62$ ,  $p = 0.535$ , though there was a quadratic effect of time for the ETL group  $b =$   
255  $-0.382$ ,  $t(16985) = -2.69$ ,  $p = 0.007$ ). Moreover, the MTL group actually had a significantly  
256 slower average response time per trial ( $b = 0.301$ ,  $t(88) = 2.11$ ,  $p = 0.038$ ). Together, these  
257 results suggest that intransitive triplets accompany more effortful and longer responding,  
258 eliminating the possibility of a speed-accuracy tradeoff.

259 Notably both the speed accuracy tradeoff and the effect of the trial number of the last trial  
260 in a triplet on intransitivity is the same for the numbers task as it is for the choice task,  
261 suggesting that the two tasks share some similarities. Finally, we examined whether there  
262 were any idiosyncratic effects on preference intransitivity associated with specific stimuli  
263 (candy bars). We found no significant differences in the average number of intransitive  
264 triplets each candy bar was involved in ( $F(1, 90) = 0.003$ ,  $p = 0.955$ ).

265 In combination, these analyses suggest that the observed increase in transitivity violations  
266 for respondents with MTL lesions in the preference task but not number-comparison task, in a

267 way that is related to the volume of hippocampal lesions, suggests a failure in value-related  
268 associations in this group.

## 269 **Discussion**

270 We provide support that brain regions associated with memory-related associative  
271 processes play a critical role in value-based decision-making. Hippocampal lesions are  
272 associated with an increase in intransitive value-based choices, and the degree of intransitivity  
273 is related to magnitude of the damage to the hippocampus. A control task not involving value-  
274 based processes does not show these effects, nor do respondents who have lesions outside of  
275 the medial temporal lobe. These dissociation results implicate a crucial role for the  
276 hippocampal areas in preference construction (Lichtenstein & Slovic, 2006), a  
277 conceptualization in behavioral decision research that contrasts with standard theories of  
278 rational choice that implicitly assume stable utility functions and choice options with  
279 preexisting values.

280 Two conceptual clarifications are in order. Our central dependent measure, the frequency  
281 of intransitive preferences has been used before to examine the inability of decision makers to  
282 produce a stable representation of the value of choice options, with other patient groups  
283 (Camille et al., 2011; Fellows & Farah, 2007). Earlier work, however, using choice  
284 intransitivity as a dependent measure did so to identify choice heuristics incompatible with  
285 utility maximization (Tversky, 1969). This resulted in a debate on the correct probabilistic  
286 model of transitivity that would account for errors in experimental data and whether that was  
287 evidence for a particular mechanism (Birnbaum & Gutierrez, 2007; Regenwetter, Dana,  
288 Davis-Stober, & Guo, 2011; Regenwetter & Davis-Stober, 2008). Our use of the term  
289 pairwise “transitivity” is not based on these frameworks and our design with two alternatives  
290 per choice does not employ such model comparison. We use intransitivity counts, as in other  
291 decision neuroscience research, instead, to examine error associated with the construction of  
292 value representations.

293 Second, our use of the term “transitivity” is only marginally related to the extensive  
294 literature measuring transitive inference, where a set of premises are learned in the experiment  
295 and participants are asked to generalize these learned rules to novel contexts and combinations  
296 of stimuli. Transitive inference tasks have been instrumental in establishing the role of the  
297 hippocampus in representing organizations of stimulus relations (Eichenbaum & Cohen,  
298 2001). Animal lesion studies established the necessity of the hippocampus for transitive  
299 inference (Bunsey & Eichenbaum, 1996; Dusek & Eichenbaum, 1997), and data from humans  
300 has confirmed the involvement of this region (Heckers, Zalesak, Weiss, Ditman, & Titone,  
301 2004; Nagode & Pardo, 2002). However transitive inference paradigms differ from ours,  
302 critically, because our respondents are stating their preferences, not learned premises. We do  
303 not present participants with transitive relations and ask them to reason following this rule.  
304 We ask for their preference between two candy bars. We do *not* hypothesize that if a  
305 participant chooses Snickers over Mars and Mars over Bounty they would also choose  
306 Snickers over Bounty because they are instructed that these choices must follow a given  
307 transitive relationship. Instead, their transitive choice reflects an anticipation that they will  
308 enjoy Snickers more. That is, while a transitive inference task implies a strict ordinal  
309 relationship between stimuli thereby recruiting working memory, transitivity of choice as  
310 measured by our design relies on values learned over time and presumably relies on the  
311 recruitment of associative facilities (Halford, 2005).

312 Despite the evidence for the involvement of the hippocampus in consistent value-based  
313 decisions, the delineation of specific cognitive and neural mechanisms provide multiple  
314 avenues for future research.

315 First, the hippocampus is just one part in a larger network of relevant brain areas involved  
316 in the retrieval and processing of choice values. A recent review (Shohamy & Turk-Browne,  
317 2013) suggests hippocampal involvement in a variety of cognitive functions outside of the  
318 domain of declarative memory providing two different hypotheses of hippocampal function:

319 The memory modulation hypothesis proposes that representations within the hippocampus  
320 may transiently bias other cognitive functions e.g. value computations in our task. The  
321 adaptive function hypothesis, in contrast, highlights the hippocampus as a central processing  
322 unit with specific computations carried out in the hippocampal networks, depending on the  
323 task at hand.

324 Our hippocampal patients produce patterns of intransitivity of value-based choice that are  
325 similar to those observed in ventromedial prefrontal cortex (vmPFC) patients, suggesting that  
326 the associations and memories stored in the hippocampus may serve as inputs to value  
327 calculation occurring elsewhere (Barron et al., 2013), potentially in line with the memory  
328 modulation hypothesis. The hippocampus is one of the most highly interconnected brain areas  
329 (Cole, Pathak, & Schneider, 2010; Godsil, Kiss, Spedding, & Jay, 2013). In addition to being  
330 directly and monosynaptically connected to the prefrontal cortex, animal work suggests a  
331 topographically specific hippocampal projections map on functionally distinct prefrontal  
332 regions (Cole et al., 2010; Godsil et al., 2013).

333 This possibility calls for a nuanced investigation of the interactions between  
334 hippocampal and prefrontal regions in value-based decision-making. For example, Ranganath  
335 and Ritchey (2012) propose a division of the MTL into two systems for memory-guided  
336 behavior: the anterior (AT) and posterior-medial (PM) system. The AT, which is comprised of  
337 the perirhinal cortex and anterior parts of the hippocampus and amygdala has strong  
338 interconnections with the frontal cortex, has been argued to be involved in familiarity-based  
339 cognition, social behavior and saliency. This is also the part of the hippocampus which is most  
340 affected in patients with hippocampal sclerosis (Woermann, Barker, Birnie, Meencke, &  
341 Duncan, 1998). Ranganath & Ritchey (2012) suggest that the AT system could facilitate the  
342 use of past experiences to inform inferences about the personality and intentions of others.  
343 Our results suggest such inferential abilities specific to distinct regions in the MTL along with  
344 the connection to the ventromedial prefrontal cortex may play a role in value-based decisions.

345           On the other hand, in line with an adaptive function hypothesis, deficits in consistent  
346 choices might be due to hippocampus-specific computations. For example, Fellows, (2006b)  
347 showed that vmPFC lesioned patients differ from normal controls in their external information  
348 search, in ways that could be attributed to diminished planning capacity. Perhaps this planning  
349 capacity relies on hippocampus-specific computations. An interesting topic of research would  
350 be whether vmPFC patients exhibit deficits in different mnemonic processes.

351           A second future research topic are potential compensation mechanisms in patients with  
352 chronic hippocampal lesions. It is well-known that chronic brain lesions may lead to  
353 compensatory shifts in neural processes, e.g. in the domain of language processing (Weber et  
354 al., 2006). The application of neuroimaging methods during a value-based decision task in  
355 these patients could provide answers to this question.

356           Third, although patients with temporal lobe epilepsy and hippocampal sclerosis do show  
357 neuropsychological deficits especially in the domain of declarative memory, the amount to  
358 which these deficits occur varies strongly between patients (Hoppe, Elger, & Helmstaedter,  
359 2007). Future research combining in-depth neuropsychological testing together with value-  
360 based choice tasks may shed light on the specific cognitive components underlying the  
361 observed range of decision deficits.

362           Our results suggest a critical role for the hippocampus in the construction of the value of  
363 choice options. Most decisions require the construction of value based on past experience.  
364 Even a previously experienced option, like a favorite dish in a familiar restaurant, requires us  
365 to compare recollections of the value of that option to newly available options such as  
366 tonight's specials. A better understanding of both internal and external inputs to preference  
367 construction processes and their aggregation and comparison will allow us to comprehend and  
368 model how the brain calculates value and makes consistent choices.



## 369 **Author contribution statements**

370 BW, EJJ and EUW designed the experiment and wrote the manuscript, EJJ and AZE  
371 analyzed the behavioral data and wrote the manuscript, IZ performed experiments, JW  
372 analyzed the MRI data. CEE provided clinical data of the patients. All authors approved the  
373 final version of the manuscript for submission.

## 374 **References**

- 375 Barron, H. C., Dolan, R. J., & Behrens, T. E. J. (2013). Online evaluation of novel choices by  
376 simultaneous representation of multiple memories. *Nature Neuroscience*, *16*(10), 1492–  
377 8. doi:10.1038/nn.3515
- 378 Bartra, O., McGuire, J. T., & Kable, J. W. (2013). The valuation system: A coordinate-based  
379 meta-analysis of BOLD fMRI experiments examining neural correlates of subjective  
380 value. *NeuroImage*, *76*, 412–427. doi:10.1016/j.neuroimage.2013.02.063
- 381 Berkovic, S. F., Andermann, F., Olivier, A., Ethier, R., Melanson, D., Robitaille, Y., Ruben  
382 Kuzniecky, R., Peters, T., & Feindel, W. (1991). Hippocampal sclerosis in temporal lobe  
383 epilepsy demonstrated by magnetic resonance imaging. *Annals of neurology*, *29*(2), 175-  
384 182.
- 385 Birnbaum, M. H., & Gutierrez, R. J. (2007). Testing for intransitivity of preferences predicted  
386 by a lexicographic semi-order. *Organizational Behavior and Human Decision Processes*,  
387 *104*(1), 96–112. doi:10.1016/j.obhdp.2007.02.001
- 388 Bunsey, M., & Eichenbaum, H. (1996). Conservation of hippocampal memory function in rats  
389 and humans. *Nature*.
- 390 Camille, N., Griffiths, C. a, Vo, K., Fellows, L. K., & Kable, J. W. (2011). Ventromedial  
391 frontal lobe damage disrupts value maximization in humans. *The Journal of*

- 392 *Neuroscience : The Official Journal of the Society for Neuroscience*, 31(20), 7527–32.  
393 doi:10.1523/JNEUROSCI.6527-10.2011
- 394 Cole, M. W., Pathak, S., & Schneider, W. (2010). Identifying the brain's most globally  
395 connected regions. *NeuroImage*, 49(4), 3132–48. doi:10.1016/j.neuroimage.2009.11.001
- 396 Dougherty, M. R. P., Gettys, C. F., & Ogden, E. E. (1999). MINERVA-DM : A Memory  
397 Processes Model for Judgments of Likelihood. *Psychological Review*, 106(1), 180–209.
- 398 Dusek, J. A., & Eichenbaum, H. (1997). The hippocampus and memory for orderly stimulus  
399 relations. *Proceedings of the National Academy of Sciences of the United States of*  
400 *America*, 94(13), 7109–7114. doi:10.1073/pnas.94.13.7109
- 401 Eichenbaum, H., & Cohen, N. J. (2001). *From Conditioning to Conscious Recollection:*  
402 *Memory Systems of the Brain. Group* (Vol. 4).  
403 doi:10.1093/acprof:oso/9780195178043.001.0001
- 404 Fellows, L. K. (2006a). Deciding how to decide: ventromedial frontal lobe damage affects  
405 information acquisition in multi-attribute decision making. *Brain : A Journal of*  
406 *Neurology*, 129(Pt 4), 944–52. doi:10.1093/brain/awl017
- 407 Fellows, L. K. (2006b). Deciding how to decide: ventromedial frontal lobe damage affects  
408 information acquisition in multi-attribute decision making. *Brain : A Journal of*  
409 *Neurology*, 129(Pt 4), 944–52. doi:10.1093/brain/awl017
- 410 Fellows, L. K., & Farah, M. J. (2007). The role of ventromedial prefrontal cortex in decision  
411 making: judgment under uncertainty or judgment per se? *Cerebral Cortex (New York,*  
412 *N.Y. : 1991)*, 17(11), 2669–74. doi:10.1093/cercor/bhl176

- 413 Firth, D., & Turner, H. L. (2012). Bradley-Terry models in R : the BradleyTerry2 package.  
414 *Development*, (2002), 1–10. Retrieved from <http://www.jstatsoft.org/search>
- 415 Gluth, S., Sommer, T., Rieskamp, J., & Büchel, C. (2015). Effective Connectivity between  
416 Hippocampus and Ventromedial Prefrontal Cortex Controls Preferential Choices from  
417 Memory. *Neuron*, 86(4), 1078–1090. doi:10.1016/j.neuron.2015.04.023
- 418 Godsil, B. P., Kiss, J. P., Spedding, M., & Jay, T. M. (2013). The hippocampal-prefrontal  
419 pathway: the weak link in psychiatric disorders? *European Neuropsychopharmacology :  
420 The Journal of the European College of Neuropsychopharmacology*, 23(10), 1165–81.  
421 doi:10.1016/j.euroneuro.2012.10.018
- 422 Haber, S. N., & Knutson, B. (2010). The reward circuit: linking primate anatomy and human  
423 imaging. *Neuropsychopharmacology : Official Publication of the American College of  
424 Neuropsychopharmacology*, 35(1), 4–26. doi:10.1038/npp.2009.129
- 425 Halford, G. S. (2005). Development of thinking. In K. J. Holyoak & R. G. Morrison (Eds.),  
426 *The Cambridge Handbook of Thinking and Reasoning* (pp. 529–558). New York:  
427 Cambridge University Press.
- 428 Hare, T. a, Camerer, C. F., & Rangel, A. (2009). Self-Control in Decision-Making Involves  
429 Modulation of the vmPFC Valuation System. *Science*, 324(May), 646–648.
- 430 Hassabis, D., Kumaran, D., Vann, S. D., & Maguire, E. a. (2007). Patients with hippocampal  
431 amnesia cannot imagine new experiences. *Proceedings of the National Academy of  
432 Sciences of the United States of America*, 104(5), 1726–31.  
433 doi:10.1073/pnas.0610561104

- 434 Heckers, S., Zalesak, M., Weiss, A. P., Ditman, T., & Titone, D. (2004). Hippocampal  
435 activation during transitive inference in humans. *Hippocampus*, *14*(2), 153–62.  
436 doi:10.1002/hipo.10189
- 437 Hoppe, C., Elger, C. E., & Helmstaedter, C. (2007). Long-term memory impairment in  
438 patients with focal epilepsy. *Epilepsia*, *48 Suppl 9*, 26–9. doi:10.1111/j.1528-  
439 1167.2007.01397.x
- 440 Hu, X., Uhle, F., Fliessbach, K., Wagner, M., Han, Y., Weber, B., & Jessen, F. (2017).  
441 Reduced future-oriented decision making in individuals with subjective cognitive  
442 decline: A functional MRI study. *Alzheimer's & Dementia: Diagnosis, Assessment &*  
443 *Disease Monitoring*, *6*, 222-231.
- 444 Kalenscher, T., Tobler, P. N., Huijbers, W., Daselaar, S. M., & Pennartz, C. M. a. (2010).  
445 Neural signatures of intransitive preferences. *Frontiers in Human Neuroscience*, *4*(June),  
446 1–14. doi:10.3389/fnhum.2010.00049
- 447 Lee, L., Amir, O., & Ariely, D. (2009). In Search of Homo Economicus: Cognitive Noise and  
448 the Role of Emotion in Preference Consistency. *Journal of Consumer Research*, *36*(2),  
449 173–187. doi:10.1086/597160
- 450 Lichtenstein, S., & Slovic, P. (Eds.). (2006). *The Construction of Preference*. New York:  
451 Cambridge University Press.
- 452 Lin, J. J., Mula, M., & Hermann, B. P. (2012). Uncovering the neurobehavioural  
453 comorbidities of epilepsy over the lifespan. *The Lancet*, *380*(9848), 1180-1192.
- 454 Nagode, J. C., & Pardo, J. V. (2002). Human hippocampal activation during transitive  
455 inference. *Neuroreport*, *13*(7), 939–44.

- 456 Peters, J., & Büchel, C. (2010). Episodic future thinking reduces reward delay discounting  
457 through an enhancement of prefrontal-mediotemporal interactions. *Neuron*, 66(1), 138–  
458 48. doi:10.1016/j.neuron.2010.03.026
- 459 Plassmann, H., O’Doherty, J., & Rangel, A. (2007). Orbitofrontal cortex encodes willingness  
460 to pay in everyday economic transactions. *The Journal of Neuroscience : The Official*  
461 *Journal of the Society for Neuroscience*, 27(37), 9984–9988.  
462 doi:10.1523/JNEUROSCI.2131-07.2007
- 463 Ranganath, C., & Ritchey, M. (2012). Two cortical systems for memory-guided behaviour.  
464 *Nature Reviews. Neuroscience*, 13(10), 713–26. doi:10.1038/nrn3338
- 465 Rangel, A., Camerer, C., & Montague, P. R. (2008). A framework for studying the  
466 neurobiology of value-based decision making. *Nature Reviews Neuroscience*, 9(7), 545–  
467 556. doi:10.1038/nrn2357
- 468 Regenwetter, M., Dana, J., Davis-Stober, C. P., & Guo, Y. (2011). Parsimonious testing of  
469 transitive or intransitive preferences: Reply to Birnbaum (2011). *Psychological Review*,  
470 118(4), 684–688. doi:10.1037/a0025291
- 471 Regenwetter, M., & Davis-Stober, C. P. (2008). There are many models of transitive  
472 preference: a tutorial review and current perspective. *Decision Modeling and Behavior in*  
473 *Complex and Uncertain Environments*, 21, 99–124.
- 474 Samuelson, P. A. (1938). A Note on the Pure Theory of Behaviour Consumer ’s Behavior.  
475 *Economica*, 5(17), 61–71.

- 476 Schacter, D. L., Addis, D. R., & Buckner, R. L. (2007). Remembering the past to imagine the  
477 future: the prospective brain. *Nature Reviews. Neuroscience*, 8(9), 657–661.  
478 doi:10.1080/08995600802554748
- 479 Shadlen, M. N., & Shohamy, D. (2016). Decision making and sequential sampling from  
480 memory. *Neuron*, 90(5), 927-939.
- 481 Shohamy, D., & Turk-Browne, N. B. (2013). Mechanisms for widespread hippocampal  
482 involvement in cognition. *Journal of Experimental Psychology. General*, 142(4), 1159–  
483 70. doi:10.1037/a0034461
- 484 Squire, L. R., Stark, C. E. L., & Clark, R. E. (2004). The medial temporal lobe. *Annual*  
485 *Review of Neuroscience*, 27, 279–306. doi:10.1146/annurev.neuro.27.070203.144130
- 486 Tversky, A. (1969). Intransitivity of preferences. *Psychological Review*, 76(1), 31–48.  
487 doi:10.1037/h0026750
- 488 Weber, B., Wellmer, J., Reuber, M., Mormann, F., Weis, S., Urbach, H., ... Fernández, G.  
489 (2006). Left hippocampal pathology is associated with atypical language lateralization in  
490 patients with focal epilepsy. *Brain : A Journal of Neurology*, 129(Pt 2), 346–51.  
491 doi:10.1093/brain/awh694
- 492 Weber, E. U., & Johnson, E. J. (2009). Mindful judgment and decision making. *Annual*  
493 *Review of Psychology*, 60, 53–85. doi:10.1146/annurev.psych.60.110707.163633
- 494 Wimmer, G. E., & Shohamy, D. (2012). Preference by association: how memory mechanisms  
495 in the hippocampus bias decisions. *Science (New York, N.Y.)*, 338(6104), 270–3.  
496 doi:10.1126/science.1223252

497 Woermann, F. G., Barker, G. J., Birnie, K. D., Meencke, H. J., & Duncan, J. S. (1998).  
498 Regional changes in hippocampal T2 relaxation and volume: a quantitative magnetic  
499 resonance imaging study of hippocampal sclerosis. *Journal of Neurology, Neurosurgery*  
500 *& Psychiatry*, 65(5), 656–664. doi:10.1136/jnnp.65.5.656

501
